# Supplementary material for: Microwave-assisted, surfactant-free synthesis of air-stable copper nanostructures and their SERS study
Source: Royal Society of Chemistry journal article supplement (doi:10.1039/c2jm35629e), 2012-01-01
Supplement: c2jm35629e.pdf [file c2jm35629e.pdf]

# ESI

## Microwave-assisted, surfactant-free synthesis of air-stable copper nanoparticles and their SERS study

M. Ibrahim Dar<sup>a,b</sup>, S. Sampath<sup>c</sup> and S.A. Shivashankar<sup>\*a,b</sup>

<sup>a</sup> Materials Research Centre, <sup>c</sup> Department of Inorganic and Physical Chemistry, <sup>b</sup> Centre for Nano Science and Engineering, Indian Institute of Science, Bangalore 560012, India

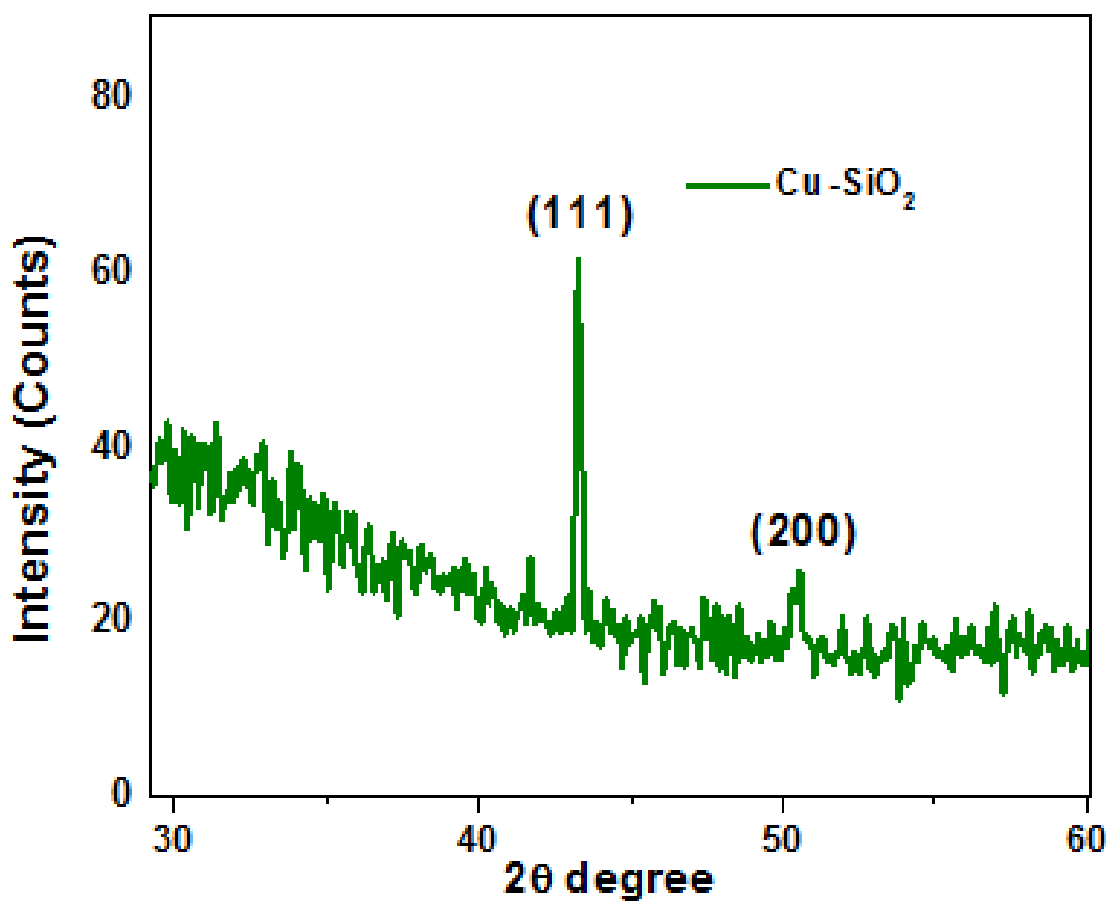

Fig. S1: Powder XRD pattern of Cu-SiO<sub>2</sub>

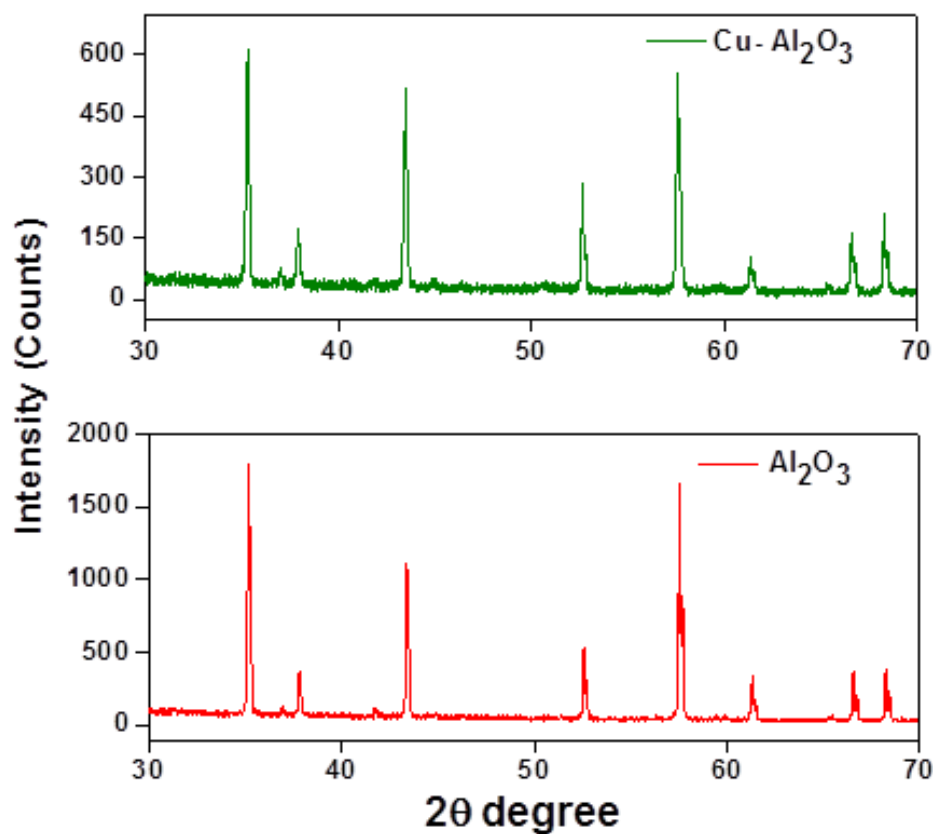

**Fig. S2:** Powder XRD pattern of Al<sub>2</sub>O<sub>3</sub> and Cu-Al<sub>2</sub>O<sub>3</sub>

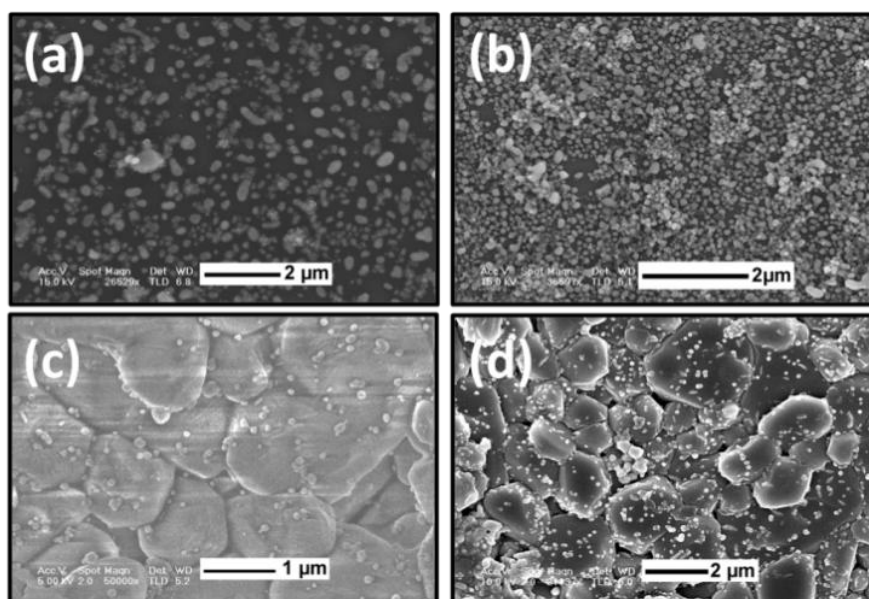

**Fig. S3:** FESEM images (a & b) Cu / SiO<sub>2</sub> and (c & d) Cu / Al<sub>2</sub>O<sub>3</sub> nanostructures. (a & c are obtained after 5 minutes ) and (b & d are obtained after 10 minutes)

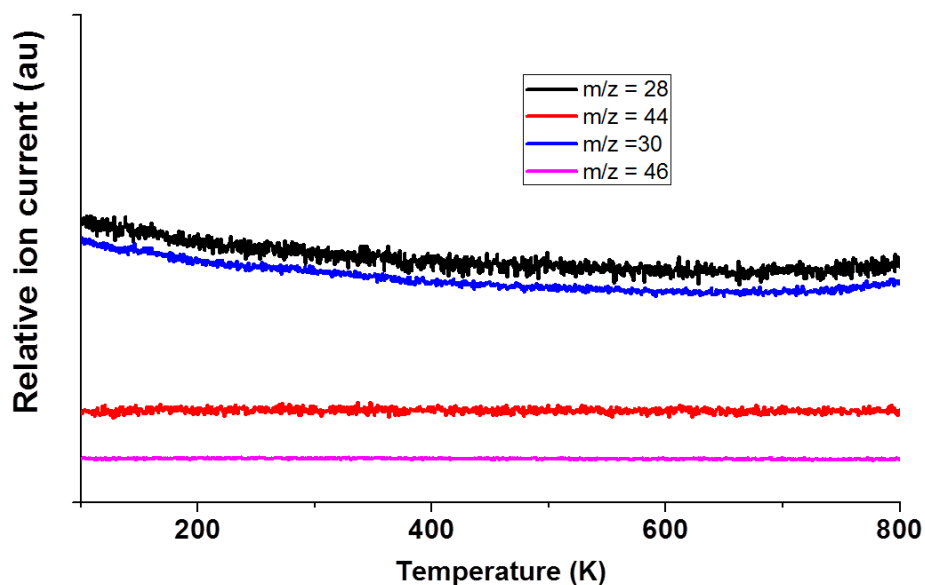

**Fig. S4:** Mass spectra of copper nanostructures under oxygen ambient

**Synthesis of PVP stabilised Copper nanoparticles:** In a round bottom flask, 50 ml reaction mixture of 26.2 mg  $\text{Cu}(\text{acac})_2$  and 0.05 g of PVP, dissolved in benzyl alcohol was exposed to microwaves at 800 watt (100%) for a duration of two minute under reflux condition. The TEM sample was prepared directly from the colloidal solution of PVP stabilized copper nanoparticles.

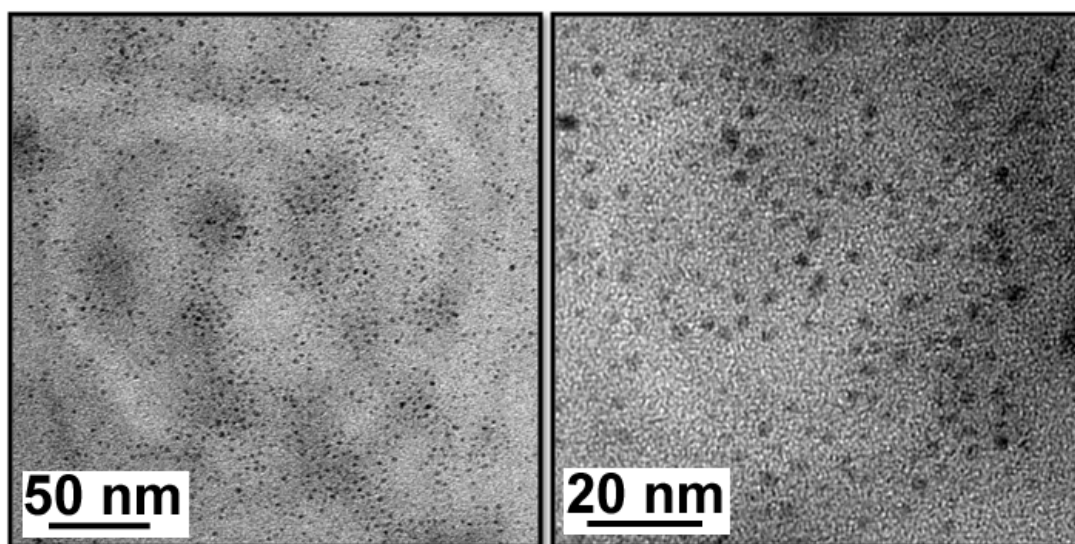

**Fig. S5:** TEM image of PVP stabilized copper nanoparticles

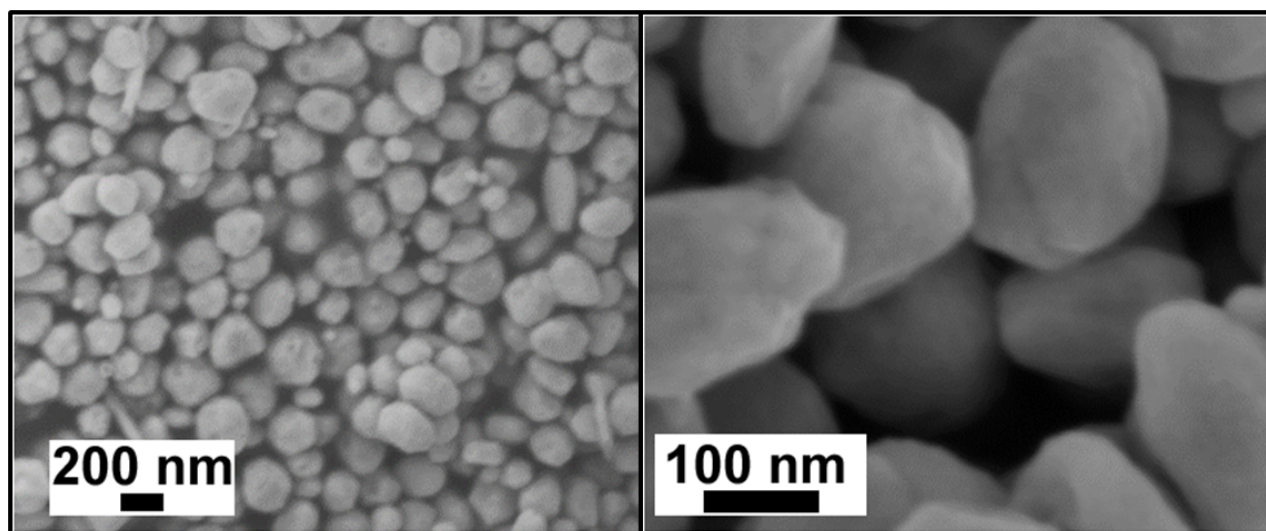

Fig. S6: FESEM (Low and High magnification) images of Cu(0) nanostructures

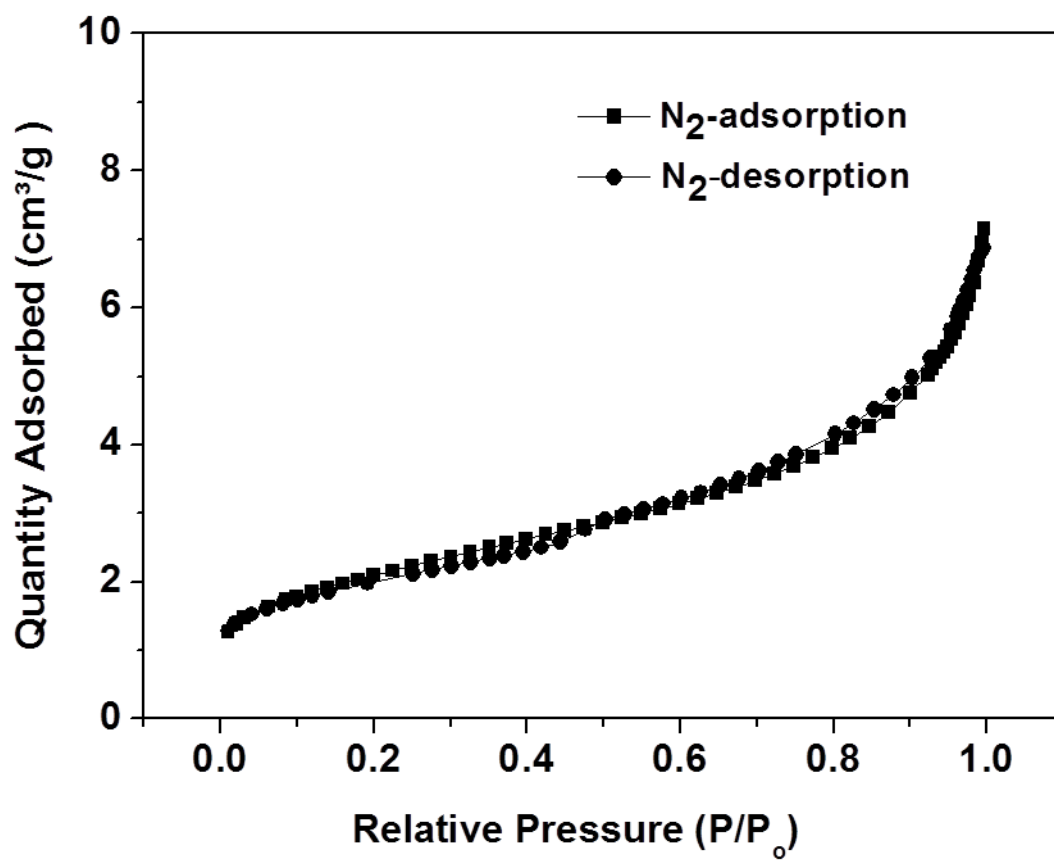

Fig. S7 N<sub>2</sub>-physorption isotherm for Cu nanostructures (powder)
